# Supplementary material for: Observing atmospheric convection with dual-scanning lidars
Source: Copernicus journal article supplement (doi:10.5194/amt-2023-31), 2023-02-20

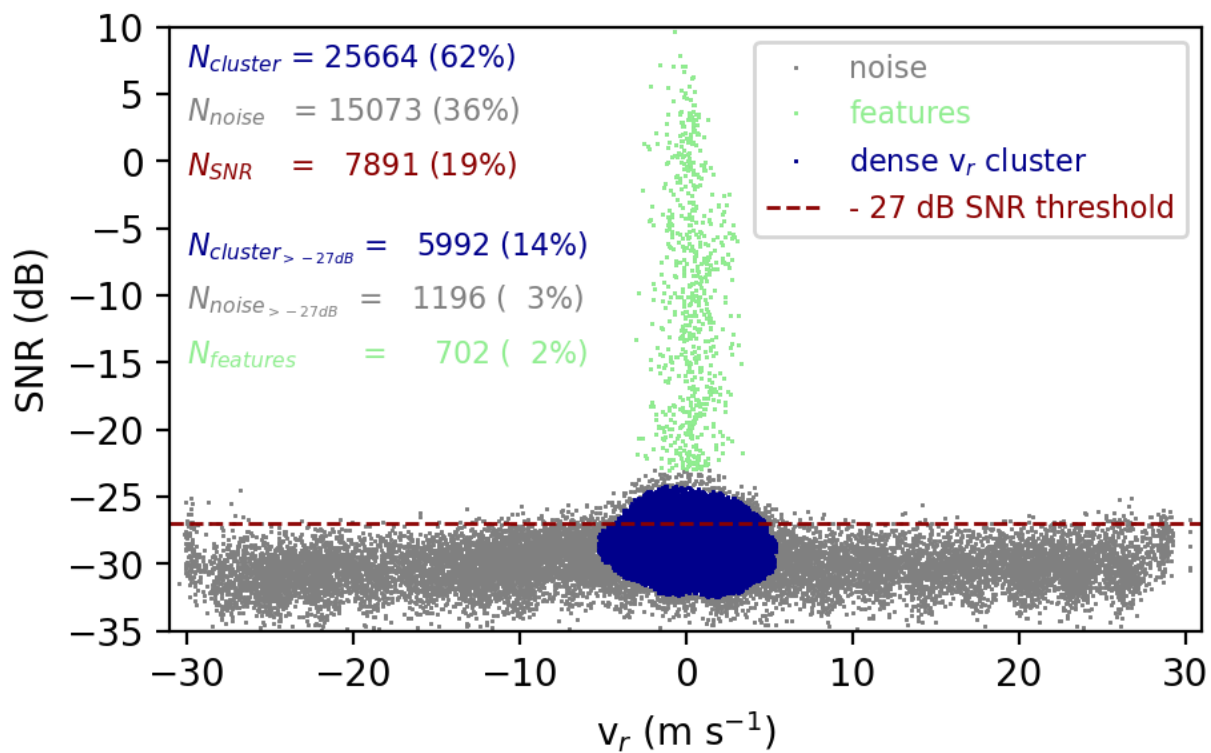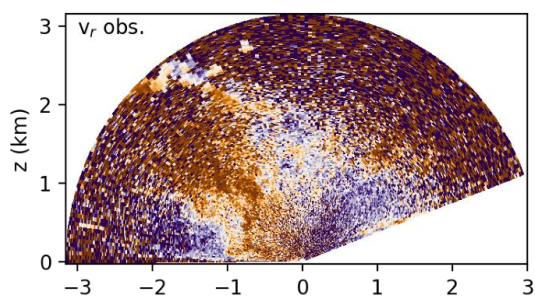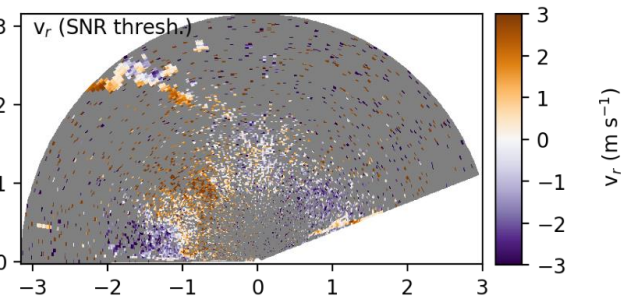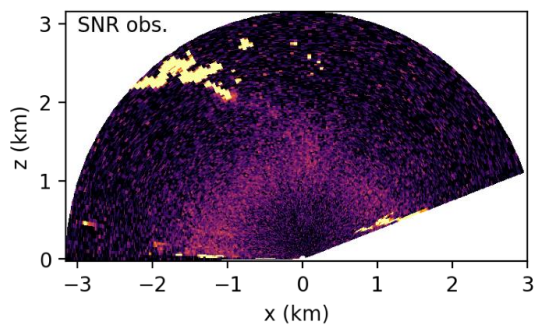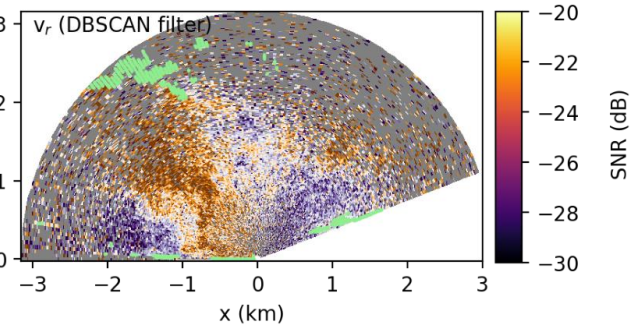

Supplement: Supplementary file [file amt-2023-31-AC2-supplement.pdf]
